# Supplementary material for: Axon-like protrusions promote small cell lung cancer migration and metastasis
Source: eLife. 2019 Dec 13;8:e50616. doi: 10.7554/eLife.50616 (PMC6940020; doi:10.7554/eLife.50616)
Supplement: Supplementary file 2. — Table 1: A Summary of all the cell line that are used and tested for protrusion formation. Table 2: Expression of genes involved in axonogenesis and axon guidance in primary human SCLC tumors by RNA-seq Table3: Expression of genes involved in axonogenesis and axon guidance in mouse SCLC tumors and metastases by RNA-seq Table 4: Metascape analysis of the top 20 clusters with their representative enriched terms (one per cluster) for the 69 candidates. Table 5: Biological process GO term analysis for the 13 selected proteins Table 6: 13 candidate genes that may control the growth of axonal-like protrusions on SCLC cells Table 7: Expression levels and dependency scores for the 13 candidates in human SCLC cells Table 8: Knock-down of the 13 candidate genes in mouse SCLC cells Table 9: RNA-seq analysis of N2N1G and KP22 mouse SCLC cells [file elife-50616-supp2.xlsx]

## Sheet: TableS1
Table 1: Summary of the cell models used
Name	Species	Type	SCLC genotype	protrusion in vitro (Matrigel)	protrusion in vivo	SCLC subtype	NFIB
KP22	mouse	cell line	Rbfl/fl; Trp53fl/fl	No protrusion	not tested	Ascl1 high	low
N2N1G	mouse	cell line	Rbfl/fl; Trp53fl/fl; p130fl/fl	medium/high	medium/high	Ascl1 high	high
16T	mouse	cell line	Rbfl/fl; Trp53fl/fl	high	high	Ascl1 high	high
6PF (mGFP)	mouse	cell line	Rbfl/fl; Trp53fl/fl; p130fl/fl	medium/high	medium/high	Ascl1 high	high
LX102	human	PDX	NA	not tested (initial culture did not grow well in vitro)	some	NEUROD1 high	not determined
LU86	human	PDX	NA	not tested (initial culture did not grow well in vitro)	some	NEUROD1 high	not determined
LU102	human	PDX	NA	not tested (initial culture did not grow well in vitro)	some	ASCL1 high	not determined
NCI-H446	human	cell line	NA	high	high	NEUROD1 high	high
NCI-H2081	human	cell line	NA	medium	not tested	ASCL1 high	medium/high
NCI-H1694	human	cell line	NA	low	not tested	NEUROD1 high	medium/low
NCI-H69	human	cell line	NA	low/no	not tested	ASCL1 high	medium/low
NCI-H82	human	cell line	NA	low/no	not tested	NEUROD1 high	medium/low
Other SCLC cell lines tested in pilot experiments, but whose analysis is not included in the study
Name	Source	Type	SCLC genotype	protrusion in vitro (Matrigel)	protrusion in vivo	SCLC subtypes
NJH29	human	cell line from PDX	NA	No protrusion	not tested	NEUROD1 high	not determined
NCI-H524	human	cell line	NA	low/no	not tested	NEUROD1 high	very low
NCI-H889	human	cell line	NA	No protrusion	not tested	ASCL1 high	medium/high
25T	mouse	cell line	Rbfl/fl; Trp53fl/fl	high	not tested	Ascl1 high	low
KP3	mouse	cell line	Rbfl/fl; Trp53fl/fl	high	not tested	Ascl1 high	high
2N1	mouse	cell line	Rbfl/fl; Trp53fl/fl; p130fl/fl	low	not tested	Ascl1 high	not determined
12PF	mouse	cell line	Rbfl/fl; Trp53fl/fl; p130fl/fl	high	not tested	Ascl1 high	not determined

## Sheet: Table 2
Table 2: Expression of genes involved in axonogenesis and axone guidance in primary human SCLC tumors by RNA-seq
	Data were extracted for Supplementary Table S10 in George, Lim et al., Nature, 2015
	When several isoforms were present, only the most highly expressed was kept
	Genes names are in column A and tumor names are on row 7
gene	Average	S00022	S00035	S00050	S00213	S00356	S00472	S00501	S00825	S00827	S00829	S00830	S00831	S00832	S00836	S00837	S00838	S01242	S01248	S01297	S01366	S01453	S01494	S01512	S01524	S01542	S01556	S01563	S01578	S01698	S01728	S01792	S01861	S01864	S01873	S02065	S02093	S02120	S02139	S02163	S02194	S02209	S02234	S02241	S02242	S02243	S02244	S02246	S02248
ALCAM	53.9572	35.8489	235.099	7.08057	207.356	43.3249	88.3477	153.996	85.538	45.115	54.3709	4.10407	86.733	38.8099	63.5154	10.7478	22.8552	10.2424	85.847	60.5808	304.154	318.098	0.672915	41.456	12.9704	25.6279	143.543	48.2057	205.328	28.9236	23.0585	20.9727	60.6511	7.45779	15.2953	30.9037	12.9036	92.185	17.7462	17.6737	5.96058	18.5815	61.3663	18.3103	21.988	7.03035	164.158	26.2782	49.9271
CXCR4	97.6676	60.5932	176.764	191.926	64.2521	163.257	137.774	206.784	131.354	115.498	61.4899	135.655	87.7755	211.936	57.588	62.5881	174.395	89.9077	59.2215	243.784	94.5355	110.482	24.3342	50.6899	119.321	153.35	23.7361	77.342	110.93	159.88	38.0359	66.0479	179.841	141.433	201.653	96.9635	200.33	58.8514	216.931	35.2637	90.6526	141.28	121.566	134.506	65.4591	62.8599	120.672	58.2717	91.2814
DBN1	54.3363	86.8881	32.0248	257.167	28.5204	71.4385	78.179	32.936	30.9901	65.7834	57.6775	73.3037	49.8984	93.9049	105.832	48.9999	65.8735	51.972	35.6207	38.0361	26.2842	48.8473	61.4769	43.9494	30.7972	33.6485	72.4108	45.1068	34.548	56.3886	42.9756	55.2378	36.8985	119.142	75.3423	26.6657	24.2584	43.9689	99.8455	84.6344	56.5671	25.7281	64.4945	43.9717	37.7429	40.6819	45.3976	25.6261	29.6093
DCC	3.27958	0.423061	0.002502	3.01523	0.101172	4.54309	0.768601	0.044009	0.167358	2.93071	5.46805	2.33751	0.024136	3.54879	0.1061	0.088122	5.29158	5.92689	0.11263	0.051538	0.283092	2.85239	2.28316	0.194782	9.80979	0.015762	0.092077	0.186462	2.7833	0.367179	9.81149	0.115013	0.42828	0.053192	0.61595	0.032384	1.60431	0.043483	34.594	4.60592	1.03059	0.10384	14.6943	0.358258	1.11334	2.3444	0.597688	0.1943	1.35137
DCK	25.5338	15.808	76.1476	17.9406	23.8388	20.283	19.6375	18.9465	31.0268	15.9286	45.1996	11.3867	19.843	27.1222	15.9159	12.7543	13.6438	28.0392	33.4435	34.5863	32.6383	25.997	7.52286	47.4658	64.7439	36.8629	25.0871	15.8788	39.6516	10.9749	25.2049	25.3187	50.5084	23.7149	26.1423	49.0456	15.2772	46.7087	45.1301	28.2962	33.9194	25.2246	20.2825	41.9255	39.4758	23.2644	22.0817	13.4851	45.5055
DCLK1	2.81368	1.58258	1.01467	6.3714	0.430576	5.10928	1.04223	1.12497	3.47685	12.3568	5.35346	1.16044	1.26147	3.0818	4.88561	2.17829	3.62828	0.789447	5.95323	1.66367	2.51523	6.69999	0.141982	1.59058	0.327896	2.51095	5.82981	0.697062	2.09862	0.935378	3.3301	1.05629	2.36021	0.783046	3.86141	2.19437	1.0243	9.45555	2.84313	3.4258	0.524346	2.87989	1.06309	0.074753	2.33851	5.10337	1.91038	2.31238	4.47488
DCX	7.72474	4.34678	1.81938	24.7509	0.174964	20.8023	5.14168	0	1.22907	40.4002	1e-06	18.2049	0.100281	57.4734	3.40903	0.081952	24.2797	3.35487	0.158783	0.007313	0.032192	11.3826	0.225782	3.75296	2.24478	0.007831	2.9e-05	3.44002	1.36199	10.526	0.072861	13.2663	0	4.48662	9.36011	3.83093	5.49898	0.935326	17.5281	3.04973	5.04721	0.013234	2.28868	13.1078	11.3374	15.5589	3.6273	0.011849	7.46756
EFNA1	17.3854	10.0153	9.09657	5.36172	9.77853	16.854	15.4017	22.1292	16.3929	5.9392	37.6211	11.8128	27.82	6.60734	18.6432	21.6319	22.8957	3.52838	10.9385	20.0349	17.7294	14.9006	4.01484	32.4337	14.5679	84.6185	27.2792	24.755	3.60895	16.4565	23.6681	9.12318	19.0134	16.5244	2.83478	17.5323	11.8445	7.38511	6.51027	8.76831	37.4355	54.9674	12.8189	20.2904	12.347	5.23174	14.7277	40.5561	11.6743
EFNA3	5.51814	7.40491	6.08515	16.7935	1.26646	6.23703	1.71796	0.655693	1.38074	3.83445	11.7516	7.58593	1.95749	1.47203	2.25184	1.76209	3.0797	2.13711	0.585147	3.04065	22.3838	2.65553	1.20527	10.1854	3.02703	14.2201	19.366	3.81712	1.34425	0.693601	0.959047	10.3385	8.9326	15.8069	5.59878	23.3453	2.48565	2.99423	2.00164	16.0862	1.33574	9.8536	1.39446	1.67385	14.4456	5.8856	0.583681	1.01034	1.23305
EFNA4	3.94318	0.44333	0.720749	0.844765	2.14187	1.33049	0.960303	0.572594	2.36718	0.691758	28.4145	3.11792	2.03459	1.10661	1.54138	4.83887	1.65505	1.00272	0.681176	2.31508	0.143745	0.331157	0.467841	0.901302	2.30092	40.227	2.06125	5.24433	0.340744	1.16638	1.33201	2.59105	2.43353	4.99082	3.81994	3.04148	2.64267	0.606965	7.02568	1.45871	7.99146	24.4374	1.16735	1.58546	4.46741	1.68274	1.06927	3.15837	0.876932
EFNA5	3.19674	2.04437	3.10058	4.5371	0.537202	1.11635	3.96948	4.84107	4.29656	0.816288	1.12334	1.42523	1.31571	4.83397	7.03674	0.438479	3.28835	9.51102	2.45267	0.127794	0.379353	1.49075	0.024745	0.752651	3.01776	1.3073	2.28026	1.01223	2.15489	3.38714	7.44195	3.53	2.30304	3.51753	4.15092	6.77648	1.90542	4.39998	10.4552	18.0303	3.57228	0.391941	8.6428	2.02339	3.84639	1.77397	2.48456	1.6768	3.29208
EFNB1	8.89379	6.23129	5.2634	8.95327	4.15378	14.0356	2.33172	1.47677	5.94805	13.1899	13.4053	11.4487	3.988	8.04741	5.27669	16.5882	11.2888	13.0549	1.84785	2.03182	1.3076	8.66839	14.949	0.750292	8.74879	4.84126	3.58824	7.88605	3.04866	12.7156	4.54307	11.4065	5.43018	9.52891	9.05798	3.41364	9.91446	5.35237	14.3106	19.276	19.03	7.27995	8.77241	14.1527	8.84241	4.69072	9.71318	19.0076	6.86954
EFNB2	8.52042	6.23912	3.62583	4.92503	3.5173	18.1556	3.27867	4.19343	7.46798	7.01979	17.5345	6.74862	10.2833	8.58627	5.06861	7.5317	9.19029	3.60772	3.47212	4.98712	3.02883	23.3264	22.0445	3.699	2.96741	7.73081	18.0041	11.5075	4.48925	9.17108	17.7972	8.24703	4.64343	12.167	12.6804	5.83622	5.93387	4.71355	2.94315	20.5735	13.8637	8.8772	6.85768	1.73129	2.3793	4.02888	4.96099	20.0652	5.32386
EFNB3	5.34325	6.07193	0.239347	3.35922	0.312998	2.09242	4.55443	1.86426	1.60395	5.91438	7.33092	10.994	1.09514	6.56507	10.7906	0.291528	5.38236	6.66225	0.352207	1.24005	0.346812	4.10314	19.3425	5.31706	0.789574	0.121113	0.441538	1.39697	4.43455	2.76873	0.932261	2.02798	0.411216	3.97611	10.5658	1.31463	1.23867	0.105519	32.5642	11.7855	4.0013	0.178194	6.78541	4.9648	11.3548	10.3439	2.75527	0.891665	1.93587
EPHA3	1.88801	0.099963	4.83673	0.321552	0.495726	4.48512	0.817252	0.903344	1.67643	1.42799	0.831768	0.772856	0.860561	0.249124	0.335155	0.37429	0.497319	6.35532	0.937915	0.278403	0.083398	6.81747	0.765299	0.044157	0.119973	0.084193	1.96824	0.946025	1.90458	0.785386	0.500199	1.02508	3.91095	4.06935	5.92276	6.89401	0.456277	0.611238	0.204093	3.88348	1.70425	0.573563	3.13945	0.371419	0.381083	1.18094	0.119005	8.43878	0.226249
EPHA4	4.35188	2.68664	6.58275	3.84045	3.01607	13.8802	6.12607	5.48661	1.51088	4.19401	19.5207	0.690069	3.2946	6.72926	5.28571	7.54336	1.82787	1.17762	6.03817	19.1862	0.548748	20.6989	13.7136	2.86527	0.324679	7.08702	2.22618	4.6335	1.68014	4.75962	1.75148	4.1062	1.5571	2.60041	0.640334	1.76912	1.09802	2.43619	3.1815	2.84749	0.77768	8.96611	1.69257	0.266587	0.789214	1.96189	5.48937	3.39513	2.70182
EPHA7	5.46352	5.32708	21.953	1.78064	4.65198	3.99213	8.52951	10.6106	2.99955	8.50241	4.29853	2.60789	13.8865	3.77584	8.77463	0.077674	5.02781	4.487	14.3395	11.7817	6.93706	10.096	5.76814	4.12674	3.78008	0.008151	30.4319	7.74964	6.63816	5.27623	4.62908	6.58918	10.8896	2.02473	3.17568	7.33159	4.9461	9.31624	4.23991	3.29921	4.13129	0.209523	5.30195	2.11923	1.28957	2.76295	7.20415	0.140153	5.31231
EPHA8	2.0331	2.89187	0.017441	4.49794	0.219782	0.179359	7.34469	1.62004	0.898408	7.63955	0.066833	1.64345	3.38016	0.190967	0.100229	0.058675	0.240508	1.51068	0.726524	0	4.57562	1.15438	47.9079	1.36588	1.53866	0.329139	0.00468	0	0.339354	0.204186	5.56921	0.359517	1.41224	1.49075	0.075485	1.09696	0.128537	6.19478	0.260332	2.55405	1.2626	0.036287	4.34593	1.84663	3.5374	0.127442	0.554164	0	0.622189
EPHB1	6.1584	1.48911	16.2316	3.68507	2.69941	16.5843	6.44381	29.0432	5.27665	5.57727	5.13784	5.4083	16.204	2.97564	10.8698	8.30036	16.8149	0.904448	14.8525	7.52733	0.569687	19.3214	0.187572	2.28188	15.1449	1.82085	0.302182	0.342352	31.1585	1.61864	49.5419	2.70879	9.76631	2.2675	0.418874	2.42927	4.45661	20.8826	9.26685	0.661443	3.95689	1.70526	3.00174	2.6761	3.89096	1.24008	5.28651	0.483059	14.3777
EPHB2	7.33255	11.8224	1.43495	11.526	1.60345	7.80989	2.79834	7.56793	1.68061	14.9189	8.90116	17.4992	5.83467	12.2154	7.52033	18.3701	6.40886	15.368	2.0632	1.73643	1.52697	18.4209	6.67789	2.3667	3.77706	7.29958	11.0292	8.58314	3.70046	15.8821	0.529546	6.54832	1.28705	12.3277	12.6331	6.47086	3.70505	10.8878	13.3005	21.3467	5.43931	1.36571	7.64732	4.25948	2.0713	3.54337	3.56276	2.1764	9.62203
EPHB3	7.34044	14.8447	4.83749	11.4382	3.40628	15.7605	6.78294	5.8002	5.14615	8.61063	13.2512	11.4699	4.65113	1.22276	15.1839	15.3376	9.8922	9.70176	5.40209	3.42654	7.26486	27.8465	5.44583	10.8066	3.62631	32.9604	26.6425	13.8449	1.25429	7.44163	6.86449	2.17223	6.21111	9.66521	1.3192	0.057328	4.09966	3.0469	4.1733	2.25989	1.86552	6.90344	5.98334	4.93183	5.86733	1.7491	5.6776	5.06476	2.97645
EPHB4	7.92125	3.52383	7.75932	2.51452	2.49856	16.2622	1.78367	9.58217	6.88396	6.61314	15.3213	9.41779	6.79155	4.46783	5.32239	21.8116	5.43081	4.34025	2.39833	2.87553	1.48996	3.96793	2.37883	1.40075	1.35133	12.1503	1.36668	7.53292	0.305402	12.9577	3.42611	7.11665	2.28891	4.57311	14.8668	0.673794	6.34204	1.96211	54.9117	17.7415	17.6041	16.2747	8.23641	4.29802	1.52297	0.744202	3.82543	26.9059	1.84699
EPHB6	1.70141	0.360028	0.116895	6.668	0.333798	0.444451	0.200757	0.612408	0.97217	1.28397	3.18358	1.16253	0.650135	0.160575	0.615589	0.863829	2.56257	0.327327	0.243847	0.211851	0.070806	0.814658	0.278309	0.074107	0.042207	4.29047	0.098885	0.991169	0.143349	0.575034	0.385235	0.232352	0.377804	2.44385	0.72203	0.031971	1.24473	0.059333	10.9246	2.76525	0.436011	3.39688	0.455254	0.04866	0.227789	0.216784	0.275996	3.90317	0.180423
FEZ1	4.07155	1.18324	2.89647	3.88237	2.48105	3.8321	1.96012	1.61417	5.41067	8.34429	2.31846	2.7675	4.8053	1.41559	1.84864	2.77485	13.7533	2.28097	1.19495	1.76792	0.535143	2.68546	8.12062	1.15529	0.667893	1.65725	2.89132	4.14765	4.1504	2.09394	2.64988	3.95741	2.92175	3.03476	12.5494	0.965194	3.65334	1.78159	1.57793	1.16063	10.599	2.60913	7.97785	2.44354	2.72902	1.43893	1.23658	21.415	1.32891
FSCN1	50.0945	20.7994	35.7284	44.4251	86.3423	82.4941	41.5632	14.2737	29.7972	114.329	63.8844	122.361	21.6944	94.5613	65.608	30.1916	52.8665	51.79	11.5881	49.5724	19.5551	80.0943	135.589	20.1598	15.4795	4.19861	45.9423	56.9701	7.39111	80.1049	57.4863	46.0901	9.09597	104.536	156.207	52.8706	37.5239	50.0929	60.151	47.3035	83.4443	10.995	71.1778	37.5401	53.3478	27.5787	46.4701	32.5767	17.1722
GAP43	10.6192	2.36461	0.852758	7.41633	0.354592	16.8497	5.66734	0.657245	4.31434	7.55473	0.301996	9.20471	1.25777	16.0365	18.3108	0.390827	49.9566	68.0507	0.049833	0.12747	0.610281	13.1536	69.3861	8.61643	10.6103	0.017151	23.5899	0.890959	23.5379	2.44472	0.419483	22.7909	1.22101	2.65971	119.694	20.0225	2.33633	13.6055	4.76804	106.36	0.3921	0.831359	0.257844	0.046186	6.2477	30.615	5.62711	0.470571	0.4874
KIF2A	6.48315	10.9476	7.66139	5.5e-05	4.54504	3.60751	14.0295	14.4808	8.30435	3.37506	9.82041	3.4244	8.83418	7.66757	2.71486	7.03318	8.13206	10.7705	8.67277	8.6373	7.52697	7.52117	7.6505	5.39978	3.47973	4.55264	11.4618	11.1244	3.57674	6.30099	13.185	10.6098	9.82352	13.1044	1.48154	5.32354	5.66614	10.2442	10.2855	0.663056	11.8551	5.17332	5.3194	5.40886	0.000241	0.006016	7.16953	3.75312	5.61647
L1CAM	8.38145	8.25817	10.6071	8.07956	2.74111	20.3666	3.6656	0.278984	7.1227	19.941	0.058541	12.848	0.613178	3.30878	7.62545	0.108129	10.0343	7.42338	9.18468	4.20843	14.352	17.2944	72.0599	5.07832	4.37526	1.5e-05	7.70959	0.262336	2.69353	5.6536	14.1684	5.89774	19.9967	4.13795	27.7887	7.00489	3.37	1.3461	3.95311	30.1946	0.669716	0	15.7325	5.57311	6.58884	16.1275	5.29283	0	14.1736
LRP8	1.90919	2.50419	1.91394	0.284232	0.376687	1.66488	1.03208	1.35173	0.280458	7.7e-05	2.16314	6e-06	1.28129	1.52397	2.3e-05	0.383756	5.32568	2.60669	0.80203	1.78688	1.62721	1.4441	0.783039	1.41782	1.82609	3.64045	6.65084	0.431736	0.824089	0.293653	0.25408	1.25705	1.31125	2.77092	0.922085	1.05714	1.19826	3.08706	5.39232	14.792	0.74645	6.94753	1.65574	0.628979	0.755797	3.36388	1.5565	0.272904	1.36427
MAP1B	28.1084	48.5951	10.6641	111.569	5.2785	38.1354	83.2217	18.8191	12.3252	113.542	11.1133	19.8975	13.2862	40.0675	60.8021	3.64837	60.2558	47.5256	42.0987	7.05785	8.33985	51.713	16.2609	19.2088	7.04627	1.75998	23.2111	19.4903	49.558	34.2386	20.9202	33.5279	24.1657	49.9005	23.7717	13.0026	8.28639	43.497	59.741	87.0648	10.9488	1.81312	92.3992	12.7466	12.2664	69.0125	13.6949	3.39634	16.0004
MAPT	4.80997	10.953	9.80669	15.2383	2.25319	1.69707	6.44832	1.96411	1.25873	6.66035	0.730355	10.1708	0.863449	6.31003	6.66271	0.046215	4.0516	15.1552	0.516496	4.67433	3.53182	6.80305	6.50996	8.53943	1.5575	0.029435	5.06731	0.399092	2.308	12.5397	1.43557	1.72834	1.64497	1.71568	6.50396	15.2801	2.70275	12.7011	2.51131	9.28114	0.425032	0	13.3496	4.62564	5.75087	17.2028	1.0537	0.275058	2.41713
NCAM1	26.5251	48.9394	66.9551	29.5429	4.9818	43.6635	47.7765	35.2524	21.3112	63.669	49.9462	24.0286	9.2431	44.6791	78.9546	17.3753	27.6043	31.0853	42.1681	20.7905	43.2607	68.5802	41.5032	48.1231	26.8303	8.84282	21.2565	10.93	16.7406	6.33981	25.1044	21.01	32.1594	26.3481	8.73838	48.8066	2.37138	37.2636	14.9092	60.4111	5.27488	2.77069	29.5159	9.93876	18.3972	19.6141	19.7954	1.52585	28.4523
NFASC	5.30329	18.5461	4.3207	9.2875	2.58105	3.56346	7.09563	5.26855	2.95142	6.89977	1.11221	7.96305	3.22408	7.16988	8.42212	0.45666	9.45396	3.66972	7.19719	0.508148	5.0365	8.90178	10.3177	5.1603	0.633679	0.086181	4.86085	4.48113	0.139233	5.65333	6.44216	6.23795	4.18125	3.94328	1.48076	3.13896	2.98346	5.277	4.80032	5.83287	1.14403	0.205638	4.72876	2.10642	1.87178	5.68798	2.1527	4.06245	6.63416
NRP1	8.75606	2.48316	4.21289	8.37725	6.49469	9.70023	5.87457	10.2254	13.4562	9.57599	35.9086	16.2782	14.0109	2.85563	5.36519	7.46601	12.1179	15.5479	6.75737	3.79229	2.06014	4.99552	2.73356	1.80465	3.0323	6.38145	6.38858	7.37284	1.80807	10.0252	4.3507	12.3979	6.91021	10.556	10.7784	4.82861	9.24924	5.44835	17.9595	4.01653	15.4714	7.42195	8.39524	2.5673	3.76118	2.95765	2.91407	26.267	5.30524
NRP2	3.79194	0.916507	2.61814	1.36732	3.1997	3.00538	1.9204	11.5981	3.97712	3.75063	1.46868	5.17223	7.7971	3.48349	2.20435	4.06988	6.73538	3.72367	4.01687	2.02303	0.633309	3.16394	11.5803	1.73287	2.07735	0.639606	1.72259	3.02674	1.64884	4.90271	12.2043	6.78003	6.92758	4.70543	9.56772	2.4257	3.66194	3.50791	0.86911	8.3891	4.81435	2.43519	2.57632	1.76124	1.94474	2.45276	2.91767	8.52264	5.71821
NTN1	2.73544	0.122893	2.93785	1.25466	0.142787	1.8602	1.62666	22.9121	0.572469	1.8628	8.56015	4.46708	2.27654	0.107517	0.725581	0.718092	1.76033	1.02077	0.303283	0.869797	0.027103	3.84271	0.979832	0.245067	2.08913	2.70415	1.60139	1.70442	1.44434	0.312007	1.19275	0.635396	0.116497	0.539765	3.97007	0.042824	3.02681	0.087401	14.9818	2.33738	1.50818	1.63419	1.26307	1.13508	0.30007	0.558457	0.134153	4.01821	8.0739
RELN	6.18868	7.54116	6.78286	29.4844	4.51969	0.858052	11.4383	0.187621	2.37422	0.54022	0.54479	25.6517	0.792468	10.2555	11.6991	12.9726	33.0159	5.99842	4.02014	0.145616	0.036125	5.04715	0.08933	0.0537	0.218809	0.293956	4.2956	2.19876	1.17864	8.56353	0.040858	62.7818	5.46272	7.42535	13.7163	6.8156	2.8561	0.229475	2.07743	8.6036	0.154424	0.53973	5.57695	14.5157	5.25698	2.51469	1.63337	0.76644	2.03085
ROBO1	8.92377	7.80623	9.10818	2.06817	13.999	20.9206	28.8257	18.8898	12.451	15.5576	2.68425	1.61779	2.44238	2.50155	23.088	0.982778	0.41862	4.30206	13.5997	10.8026	19.2393	39.4787	2.91867	26.9137	0.860227	0.260001	2.04792	3.49378	59.3668	7.17534	6.23924	5.33724	12.6364	1.46741	13.6282	7.46494	4.80733	74.9132	1.29158	6.6911	0.101834	1.2755	8.98234	2.47002	4.17782	1.87218	5.18062	2.2661	9.01867
ROBO2	1.02917	0.203862	6.10917	1.1541	0.686591	0.980635	0.489347	0.261733	0.682498	0.609478	1.3127	1.93572	0.701058	1.93058	1.18543	0.548499	0.279846	2.35714	0.241586	0.46501	1.53938	0.895729	7.92688	0.191151	0.42662	0	0.62681	0.830602	0.35621	0.323675	2.0185	2.73819	0.466552	0.959088	3.17361	0.396504	0.562375	1.30831	0.860969	3.05844	0.04086	0.089178	2.51863	0.232947	0.157002	0.57901	0.406383	3.54135	0.34835
ROBO3	1.65063	0.362954	2.48369	0.925416	0.343135	0.626586	0.150536	0.197829	0.579962	9.58738	1.97811	0.782892	0.33739	20.0227	0.317393	1.07638	0.805301	0.219094	0.198003	0.174963	0.116185	0.11363	11.4349	0.187749	0.079871	10.7213	0.839271	0.266997	0.487533	0.297543	0.270695	0.049826	0.529862	0.930763	6.58617	0.331897	0.672977	0.03145	0.519883	3.85152	0.456889	0.552395	0.39366	0.059086	0.546973	0.144718	0.315603	1.62873	0.191302
ROBO4	3.45932	3.15439	3.27209	3.04135	1.86125	4.84144	2.66289	2.14088	8.72366	3.36734	1.26775	4.70279	2.86779	2.88314	3.98902	3.69723	2.81453	0.92285	1.85212	1.40571	0.908033	2.39221	8.25885	0.88168	0.834394	0.632973	1.48961	5.21771	0.310384	4.68528	3.11251	10.0253	1.36167	9.47255	1.16558	0.476954	5.30251	3.24611	4.38146	2.0018	13.528	2.563	4.44572	0.636117	1.09029	0.715012	2.02888	25.2086	1.46718
SEMA3A	1.36384	0.080361	0.128234	1.00987	0.848827	0.729733	0.169367	0.37473	0.957258	1.06851	0.607718	0.621775	1.16949	1.57355	0.277285	0.767559	3.06508	1.31882	0.779201	5.49266	0.053547	2.86044	1.61478	0.080254	0.059505	0.067273	0.776932	0.265712	0.192146	0.521999	0.197337	0.427549	0.660323	1.24439	3.17278	1.13093	2.63543	0.347462	0.185003	4.94708	0.93798	0.479015	0.356039	0.030013	1.8873	0.186259	0.106971	1.59445	0.394805
SEMA3B	1.88207	0.548255	0.971029	2.38659	1.37149	2.54161	1.68348	0.894947	6.7e-05	1.06879	0.919615	3.29523	2.11282	3.2e-05	1.246	2.08704	0.540341	1.59526	0.593691	1.4e-05	1.13066	1.1765	0.944935	1.17323	0.000182	1.80352	7e-06	4.6148	0.773998	1.36848	2.01116	1.93952	1.14351	3.49594	3.93394	5.5e-05	1.43362	0.350586	0.346887	0.724566	2.03925	1.21802	2.36751	0.634947	1.02213	1.17463	2.02585	10.9484	1.60616
SEMA3C	3.76398	0.313295	1.55251	0.472829	2.95461	2.69497	1.2086	2.52509	3.62442	1.09315	1.58366	1.95241	7.81394	2.61443	2.09946	2.42379	6.04826	5.36855	3.5121	0.802118	0.090056	9.00671	12.433	0.225771	0.643537	2.80415	1.5967	3.68227	6.05708	2.2306	3.51189	1.80079	5.01878	0.879634	7.63753	1.64265	9.82623	1.00567	0.541155	11.4672	3.01281	3.94982	1.66047	0.225801	1.67405	2.00295	1.88558	20.8816	1.64831
SEMA3D	1.20838	0.88189	0.210562	0.017999	2.35815	0.368739	0.11443	0.034516	0.784334	0.208398	1.9394	0.099125	0.358614	1.92945	1.10798	13.8185	0.844139	0.275823	0.235241	2.40881	4.8765	3.17466	0.067056	0.006293	0.011494	0.012997	1.15708	0.191417	0.597202	0.094799	0.128152	0.257994	0.423652	1.17036	0.190459	2.27332	0.390132	4.97083	0.051894	7.44627	0.648266	0.239895	1.60845	0.050242	0.122171	0.856156	0.347937	5.2331	0.172255
SEMA3E	0.327175	0.026573	0.089496	0	0.124511	0.284654	1e-06	0.061415	0.829227	0.433408	0.219114	0	1.14702	0.072347	0.178418	0.155658	0.037091	0	0.935931	0.654625	0	0.512275	0	0.150755	0.126366	0	0.776183	0.30733	0.073037	0.037554	0.117451	0	0.036354	0	0.091519	0	0.084667	0.209632	0.070884	0	0.070838	0.064928	0.064643	0	0	0	0.065896	0.5512	0.21903
SEMA3F	9.04582	13.0966	10.181	10.1266	4.39111	9.0151	6.29804	11.9615	9.03604	9.39942	12.6969	18.6896	10.8861	5.67246	13.8655	13.7643	8.84034	3.60268	4.16383	9.85056	2.47587	10.911	21.7075	2.9207	4.28044	11.0677	3.42811	14.7572	0.979054	15.3604	17.3662	17.8737	4.86501	9.78928	11.0889	3.72355	9.5036	4.07268	6.46081	5.25408	14.0761	7.11137	5.34669	6.28346	8.02815	6.10671	7.67762	15.9143	6.82757
SEMA3G	1.2624	0.643177	0.155424	1.38151	1.16452	0.99931	0.514001	0.599959	0.905483	0.571912	0.307909	0.576897	2.35842	0.41185	0.656798	1.56029	1.39789	0.22226	0.809874	1.64995	0.58817	0.524531	0.54261	0.52824	0.298852	0.366818	0.463916	3.17542	0.257352	1.0233	0.936053	1.09244	0.317937	0.618215	0.747806	0.39638	1.44557	0.710169	0.697405	0.520218	0.258965	1.22579	1.22255	0.322265	0.200773	0.280068	0.680312	9.2276	1.08386
SEMA4B	7.47496	11.7801	7.92896	8.69348	4.76889	8.81322	4.02664	8.09267	6.86527	7.86712	6.36184	7.80008	31.2056	1.92179	19.6677	5.06237	14.134	11.0178	6.53087	6.04846	9.38512	5.3589	4.72887	8.6897	1.38178	17.4209	3.97094	13.2517	2.47189	8.91356	9.76977	5.27786	8.02243	5.81295	3.21099	2.5e-05	11.3696	0.390287	3.0949	3.40958	3.16591	4.50577	7.48607	2.3598	2.98515	4.33119	9.31767	7.51342	11.491
SEMA4C	17.1254	18.9277	27.7177	8.04675	20.3985	18.4218	19.0472	19.9958	17.4547	18.2698	12.3049	15.7514	32.0802	15.1471	26.6941	14.391	17.7995	4.83721	20.8877	14.2073	30.8539	37.6474	14.5125	11.9152	16.3447	27.0003	9.56986	27.305	3.59541	16.0834	27.8243	12.928	17.8113	14.666	8.58444	8.73619	12.1361	12.0608	17.3413	13.1424	11.327	14.806	13.7404	3.73537	6.23819	10.0406	14.7088	15.7384	14.4499
SEMA4D	10.6884	9.30853	8.81444	13.6143	9.91802	9.43462	10.939	20.2627	9.93919	9.64958	11.346	16.2039	13.2982	6.05939	9.04125	8.41325	5.99931	10.1747	13.597	6.69522	8.92837	14.7624	9.35091	5.23274	7.66948	10.7325	3.76565	13.0812	4.75291	10.6935	12.7966	5.38909	13.2813	17.4682	9.28275	7.17621	17.8603	6.23031	26.1506	8.88895	3.23489	5.9331	11.9819	1.94573	5.92361	5.63503	8.04135	10.2393	16.3088
SEMA4F	3.45955	1.87276	6.99378	3.94256	3.58942	3.05488	2.64174	3.70554	2.5545	3.7764	4.58173	4.24541	3.29914	3.99701	6.17499	3.76078	2.64343	1.49759	3.07402	9.33393	8.04006	6.28833	13.1423	6.93124	3.75573	2.44283	0.472122	4.0632	0.703608	2.08056	2.04473	2.63521	1.9644	2.17069	3.25818	4.73828	1.84142	5.12456	3.15142	3.68782	2.0018	1.42999	5.34242	0.918476	2.45227	3.15342	2.51865	2.18759	3.90037
SEMA4G	1.30969	2.05593	0.806424	2.47388	0.496088	1.22881	1.31449	1.29649	0.628987	1.43677	0.550327	1.70424	0.535355	1.65858	1.98147	1.23497	2.0453	0.489076	0.505741	1.19687	1.58887	4.49234	4.85398	1.09344	0.395046	0.273924	0.54991	1.87222	0.164113	1.01605	1.34761	0.778077	0.853904	0.753365	0.38526	0.640773	0.368873	0.974892	1.03098	1.52684	0.300303	0.336159	0.867901	0.141181	0.448268	0.606955	0.810669	1.2822	0.617364
SEMA5A	2.53914	1.20921	0.531007	9.36939	0.98541	1.47734	1.37497	1.42355	1.61923	1.41153	0.983441	1.47977	3.53697	0.639211	3.74281	1.24872	3.84201	1.21377	0.903208	0.582613	0.547425	1.35018	0.682909	0.248804	0.250277	0.090652	12.5157	1.43505	0.476873	1.02746	1.66713	14.0183	2.50259	3.07034	0.947491	0.13171	1.87895	1.40572	3.41468	0.532513	2.70623	0.730895	3.42378	4.29991	4.46354	0.5296	0.324546	3.89454	0.241893
SEMA5B	1.24171	0.342049	0.704215	1.33853	0.494537	1.20502	4e-06	0.322436	3.91467	0.725196	0.514312	0.851381	0.723299	0.155615	0.539343	0.173287	1.52265	0.000388	0.22896	2.5e-05	0.270282	2.22168	12.3169	2e-06	0.548397	0.123636	0.440754	0.816772	0.180434	0.11103	1.88869	0.1119	0.751379	1.65299	0.179264	0.077805	0.25127	0.967509	1.57819	0.843119	3.65422	0.286706	0.340029	0.003398	0.086877	0.322156	0.391988	0.21192	0.575722
SEMA6A	6.25098	4.34395	0.957972	37.1252	0.275327	1.37996	2.78648	0.683415	2.11275	7.22504	0.438214	12.5787	0.771169	10.1218	0.470949	0.867065	16.9979	9.69193	0.9476	0.458691	0.199196	1.50666	3.7304	1.66116	1.13291	0.197127	1.54957	1.00454	1.36069	8.37369	2.34192	14.9456	0.496707	3.17564	7.31346	2.85561	2.31584	4.3071	9.11426	31.5042	8.20672	1.01655	12.6647	4.99674	9.96763	4.65501	0.470286	5.13544	3.22417
SEMA6B	2.85985	2.63266	2.28059	2.54907	1.64636	1.38951	1.57744	2.00557	2.71474	4.10109	1.77371	8.65161	3.21512	2.76623	1.77402	3.34621	2.90502	2.92044	0.916288	1.82529	1.16839	1.84851	5.60196	1.89197	0.377683	0.992955	1.06021	2.74348	1.11128	3.30033	0.757848	3.38034	1.51469	5.12426	9.43278	0.93147	2.33669	1.7058	2.15368	3.84583	7.79323	1.59454	3.1211	0.599611	0.869824	2.74744	1.30574	6.89152	0.87066
SEMA6C	10.1348	6.68028	4.61939	19.1262	3.19281	8.46642	7.68388	1.47766	5.34776	8.9032	12.248	24.7029	2.00311	9.68529	7.94621	3.95598	16.2669	4.05429	3.95191	6.53233	6.62022	10.7857	6.23449	7.83298	6.67854	8.27377	5.36617	8.48291	3.4184	9.88494	10.8026	10.5899	9.17883	17.4682	8.02048	10.6588	4.78514	6.89029	5.26358	14.2514	6.57338	8.1942	7.3873	8.01951	13.0457	10.5649	4.25327	3.08934	8.91043
SEMA6D	2.02734	3.10107	1.41904	7.52251	1.99247	3.08657	1.11716	1.79774	1.9145	2.50746	0	2.95985	2.57581	2.57903	0.79478	0.734606	2.02882	1.70896	1.76553	0.633107	2.85061	3.66618	8.3803	0.721204	0.506418	2e-06	1.12373	1.19197	2.3412	1.78625	1.58229	1.69666	1.95178	1.72024	1.8061	2.25188	0.794002	1.87682	6.98019	4.31721	0.543518	0	3.16657	1.68778	2.23211	1.11351	1.63754	1.5e-05	2.29301
SEMA7A	1.58945	0.169165	2.04409	0.282544	1.63241	1.56655	1.17927	1.56097	3.85595	1.74452	1.82234	4.79752	5.88475	1.17828	2.56194	5.28375	1.60571	0.472452	9e-05	0.840592	0.305297	0.780971	3.95052	3e-06	4.1e-05	0.537947	0.482617	2.01071	3e-06	3.65353	1.66349	0.777991	1.26773	5.09893	2.96051	2e-06	4.43834	0.263233	0.912899	0.606926	3.75965	1.27024	1.39976	3e-06	0.375183	0.2775	0.570993	1.63546	1.18826
SLIT1	5.15077	33.3701	2.12556	0.70944	1.2051	6.83222	0.796546	6.91444	0.166988	3.46518	0.156315	4.85617	1.85951	5.22502	4.55764	0.135122	4.484	4.25322	1.04419	0.404605	2.0969	11.7529	7.03511	14.9517	7.5455	1.3288	3.60615	2.62809	0.976194	2.92262	15.2621	9.81519	2.93902	2.7853	0.257121	6.48379	1.60453	3.21518	0.122123	1.7691	4.1205	0.128995	1.75104	0.939051	5.5472	2.03445	1.49473	0.143192	3.01744
SLIT2	3.34892	0.671182	0.50497	6.91846	2.03416	5.16865	1.20901	2.19433	5.04872	3.36495	2.46561	6.78899	3.79059	1.14683	2.04998	2.5569	3.84246	4.54703	1.89653	0.556062	0.352497	3.23992	1.05449	0.985349	0.32224	4.00053	4.90264	4.54653	0.679398	3.69427	2.93941	6.88637	2.37172	1.16631	2.5494	2.66846	7.74209	1.89888	2.13859	0.627503	6.08704	5.14837	2.76195	0.925945	3.52257	1.83612	0.631622	15.4232	0.643393
SLIT3	3.27986	5.37029	0.921647	5.68779	1.03258	2.00176	1.93397	3.09743	6.97175	3.92143	0.2755	5.40097	2.18514	3.59858	2.62568	7.08948	9.01157	1.0854	1.22985	1.2806	1.94809	2.27501	3.68909	0.573409	0.143311	0.258189	0.819029	7.11531	0.18113	3.44998	1.65923	3.9638	0.633222	3.28238	1.36151	0.181246	2.2792	3.41372	0.801295	1.52165	4.37044	2.49152	3.53947	1.82516	0.158659	0.506379	0.913611	32.755	0.87881
TIAM1	9.75059	19.1465	16.4348	36.1504	3.41592	22.7425	10.0561	9.75389	7.26294	10.7922	3.05524	17.3131	6.02564	15.0489	12.1752	11.8307	9.30321	11.5406	7.96688	3.89928	4.31948	17.3348	4.81473	6.23841	7.72411	3.22751	1.81256	9.99779	11.4557	12.7293	7.59397	9.67436	5.07883	9.96187	6.21122	5.62828	7.14611	4.94674	17.1913	10.7618	4.37772	5.52655	10.1497	5.98097	5.38065	8.82031	7.09738	2.80089	10.9885
TUBB3	151.725	346.155	43.1713	777.628	56.7807	314.37	110.313	29.1668	98.8253	183.667	103.361	309.722	36.7579	230.225	285.493	12.7392	63.0993	201.965	129.207	97.7086	34.6394	311.695	135.851	109.553	103.376	163.809	233.266	278.105	76.8814	317.392	303.585	240.742	37.8343	161.198	572.788	531.863	27.9824	212.848	197.176	130.016	68.4355	92.9228	162.477	186.994	205.269	174.473	171.134	5.00633	67.0576
UNC5A	7.34857	25.5209	6.41785	68.1126	2.89143	6.75189	8.24682	0.442212	0.915287	7.51857	2.21805	13.6045	5.72393	9.10233	4.2042	0.205433	12.95	7.41778	4.64583	0.150178	1.1214	14.6798	0.627531	3.18906	7.34926	0.029611	2.1595	5.99496	6.72401	9.80605	6.29564	5.59936	6.36154	12.3069	3.51586	2.62375	3.4429	9.56471	1.99501	9.28433	7.38372	0.064485	5.03263	4.22613	6.90341	12.6212	0.970472	0.636021	8.89299
UNC5B	5.83712	9.45673	5.19463	7.9688	3.4867	15.9399	6.98604	4.70082	4.73905	20.1444	2.46911	11.034	10.5278	8.15855	8.90185	4.82538	2.18104	2.39501	1.98465	2.45857	1.50329	34.9563	10.1944	2.57076	9.3e-05	1.36168	7.6165	5.50026	0.00017	11.7665	9.74518	9.51433	5.80465	4.91525	5.15688	1.91289	4.92679	3.13876	3.61388	12.9513	8.45896	1.9275	4.74926	1.55176	0.404635	4.11143	3.96411	6.10952	3.05308
UNC5C	0.363591	0.032875	0.142341	0.183904	0.318265	0.205404	0.242479	0.342627	0.430223	0.260808	0.716509	0.270483	0.469748	0.132856	0.146724	0.358166	0.391558	0.308585	0.390051	0.145197	0.098936	0.260903	0.256596	0.031598	0.038413	0.070638	0.131879	0.385768	0.060028	0.466152	0.338551	0.299914	0.407007	0.390568	0.618279	0.15789	0.92505	0.12781	0.095306	0.11241	0.232606	0.227677	0.236678	0.038748	0.141804	0.208195	0.142642	1.96268	0.084646
VLDLR	8.26093	5.23223	18.3505	1.58713	2.35741	6.68512	8.15182	17.3554	10.5281	6.47436	25.2705	3.1436	13.0345	11.9304	17.0908	10.8015	0.735834	14.5035	11.6551	5.69274	21.5417	15.7741	9.11828	11.903	1.46179	33.9187	2.6453	8.01238	18.001	19.0894	12.244	3.16313	6.50054	5.80282	0.608068	8.78056	1.30525	1.94758	3.15646	4.94313	0.805474	18.6593	9.60949	5.85576	1.24108	2.48329	14.2299	6.003	5.69638
[truncated: 33 more columns]

## Sheet: Table 3 summary
Table 3: Expression of genes involved in axonogenesis and axone guidance in mouse SCLC tumors and metastases by RNA-seq
Data from Yang et al., Cancer Discovery, 2018 (Table S3)
Tumors were initiated by Adeno-CMV-Cre ("CMV") or Adeno-CGRP-Cre ("CGRP")
Differential Expression Analysis
	Fold change meaning
Comparisons/tab#:	positive value	negative value
1. CMV_Nfib_low_Primary tumor_vs _CMV_Metastasis	higher expression in CMV_Nfib_low_primary_ tumor	lower expression in CMV_Nfib_low_primary_tumor
2. CGRP_Primary_tumor_vs_CGRP_Metastasis	higher expression in CGRP_primary_tumor	lower expression in CGRP_primary_tumor

## Sheet: 1.cmv_primary_vs_cmv_met
Name	logFC	adj.P.Val
Alcam	0.252803	0.186032
Cxcr4	-0.689432	0.00393659
Dbn1	-2.82826	9.82e-07
Dcc	-0.519229	0.2657
Dck	-0.392212	0.000134129
Dclk1	-0.655591	0.11171
Dcx	-1.97874	0.000828002
Efna1	1.79771	4.53e-05
Efna3	0.163672	0.569031
Efna4	-0.58362	0.00610144
Efna5	0.0787166	0.824778
Efnb1	1.10598	2.69e-05
Efnb2	0.18532	0.501216
Efnb3	-1.4975	5.29e-06
Epha3	-1.01789	0.00989572
Epha4	0.126341	0.689772
Epha7	-0.0864452	0.828483
Epha8	-1.24697	0.000587781
Ephb1	-0.0210766	0.827062
Ephb2	-0.172547	0.125402
Ephb3	0.357027	0.00131974
Ephb4	1.01899	7.54e-06
Ephb6	-0.0415094	0.841965
Fez1	-1.42042	0.000177484
Fscn1	-2.15006	2.1e-06
Gap43	-2.2747	5.97e-06
Kif2a	-0.333893	0.00153856
L1cam	0.401945	0.0147474
Lrp8	-0.871838	0.000125661
map1b
Mapt	-1.70405	8.05e-08
Ncam1	-0.502983	0.00313563
Nfasc	-0.154409	0.197957
Nrp1	0.106175	0.680576
Nrp2	-1.0521	0.000503247
Ntn1	1.58591	4.79e-05
Reln	-1.01927	0.00790569
Robo1	1.3251	0.000270226
Robo2	-0.167293	0.538335
Robo3	0.0686901	0.0884164
Robo4	0.159123	0.0929192
Sema3a	0.598063	0.0417745
Sema3b	1.14502	1.71e-05
Sema3c	-0.356547	0.499648
Sema3d	-1.55536	0.000107699
Sema3e	0.497569	0.00263723
Sema3f	0.822156	0.000247588
Sema3g	-0.0269584	0.911679
Sema4b	0.381231	0.000346594
Sema4c	-0.0976136	0.500078
Sema4d	0.325473	0.000731293
Sema4f	0.263281	0.172583
Sema4g	-1.02841	5.4e-06
Sema5a	0.947013	0.00152648
Sema5b	0.291166	0.490582
Sema6a	-0.414719	0.139553
Sema6b	0.820978	0.00213702
Sema6c	-1.71666	2.61e-07
Sema6d	-0.972412	0.00258965
Sema7a	1.67948	1.49e-08
Slit1	-1.72438	2.58e-07
Slit2	-1.60897	6.71e-05
Slit3	0.228392	0.0174972
Tiam1	-0.861766	3.14e-08
Tubb3	-1.75453	1.53e-06
Unc5a	1.07377	4.29e-06
Unc5b	0.806276	0.0119309
Unc5c	-0.310788	0.208765
Vldlr	-1.13742	0.00100442

## Sheet: 2.CGRP_primary_vs_CGRP_met
Name	logFC	adj.P.Val
Alcam	0.189425	0.935222
Cxcr4	0.109899	0.874169
Dbn1	-0.278809	0.854353
Dcc	0.130681	0.939357
Dck	-0.180678	0.796706
Dclk1	-0.246418	0.829852
Efna1	-0.186056	0.840467
Efna3	-0.125314	0.899667
Efna4	0.00150138	0.998382
Efna5	0.085862	0.977907
Efna5	0.346934	0.772068
Efnb1	1.30858	0.301731
Efnb2	0.327654	0.796706
Efnb3	0.0555215	0.965034
Epha3	-0.0217086	0.945135
Epha4	0.0804208	0.917122
Epha7	0.138044	0.838013
Epha8	0.113287	0.843238
Ephb1	0.0291479	0.898214
Ephb2	0.392233	0.772068
Ephb3	0.345021	0.76338
Ephb4	0.163207	0.826208
Ephb6	0.225394	0.838727
Fez1	0.0219314	0.988778
Fscn1	-0.0850451	0.968743
Gap43	0.22824	0.892542
Kif2a	-0.170869	0.796516
L1cam	0.257893	0.841489
Lrp8	0.11243	0.870529
Map1b
Mapt	0.12088	0.890095
Ncam1	0.200448	0.796706
Nfasc	0.523451	0.753378
Nrp1	-0.115488	0.905415
Nrp2	-0.109094	0.939082
Ntn1	0.307904	0.882544
Reln	0.0689716	0.820345
Robo1	0.881267	0.581267
Robo2	-0.0818259	0.970507
Robo3	-0.112491	0.881457
Robo4	0.274843	0.772068
Sema3a	0.217362	0.79889
Sema3b	0.133218	0.933089
Sema3c	0.00356043	0.998382
Sema3d	0.0623125	0.932876
Sema3e	0.379352	0.721038
Sema3f	0.0551131	0.971555
Sema3g	0.332588	0.77972
Sema4b	0.314662	0.773613
Sema4c	-0.0327347	0.959722
Sema4d	0.194244	0.808687
Sema4f	0.168965	0.833724
Sema4g	-0.179899	0.851192
Sema5a	0.510554	0.772068
Sema5b	0.177075	0.919763
Sema6a	0.229992	0.796706
Sema6b	0.249731	0.853256
Sema6c	-0.0138232	0.98957
Sema6d	-0.183714	0.905345
Sema7a	0.124569	0.917339
Slit1	0.0885953	0.954558
Slit2	0.289921	0.820288
Slit3	0.204537	0.772068
Tiam1	0.0741124	0.911182
Tubb3	-0.016882	0.991859
Unc5a	0.537146	0.772461
Unc5b	0.415512	0.78359
Unc5c	0.129317	0.87178
Vldlr	0.103393	0.864211

## Sheet: Table 4
Table 4: Metascape analysis of the top 20 clusters with their representative enriched terms (one per cluster) for the 69 candidates.
Count is the number of genes in the user-provided lists with membership in the given ontology term. "%" is the percentage of all of the user-provided genes that are found in the given ontology term
(only input genes with at least one ontology term annotation are included in the calculation). "Log10(P)" is the p-value in log base 10. "Log10(q)" is the multi-test adjusted p-value in log base 10.
GO	Category	Description	Count	%	Log10(P)	Log10(q)
GO:0007411	GO Biological Processes	axon guidance	59	85.51	-100	-96.29
GO:0050919	GO Biological Processes	negative chemotaxis	28	40.58	-63.29	-60.12
R-HSA-422475	Reactome Gene Sets	Axon guidance	47	68.12	-60.37	-57.23
R-HSA-3928665	Reactome Gene Sets	EPH-ephrin mediated repulsion of cells	17	24.64	-31.04	-28.53
GO:0050808	GO Biological Processes	synapse organization	24	34.78	-24.82	-22.37
GO:0051962	GO Biological Processes	positive regulation of nervous system development	25	36.23	-23.4	-20.97
GO:0021954	GO Biological Processes	central nervous system neuron development	15	21.74	-22.93	-20.51
GO:0031290	GO Biological Processes	retinal ganglion cell axon guidance	11	15.94	-22.81	-20.39
R-HSA-428542	Reactome Gene Sets	Regulation of commissural axon pathfinding by SLIT and ROBO	8	11.59	-18.88	-16.54
R-HSA-3928663	Reactome Gene Sets	EPHA-mediated growth cone collapse	8	11.59	-13.79	-11.49
R-HSA-373752	Reactome Gene Sets	Netrin-1 signaling	9	13.04	-13.77	-11.48
GO:0021800	GO Biological Processes	cerebral cortex tangential migration	6	8.7	-13.44	-11.15
R-HSA-373760	Reactome Gene Sets	L1CAM interactions	10	14.49	-11.82	-9.59
GO:0001568	GO Biological Processes	blood vessel development	18	26.09	-11.48	-9.28
GO:0001764	GO Biological Processes	neuron migration	10	14.49	-10.69	-8.54
GO:0048729	GO Biological Processes	tissue morphogenesis	14	20.29	-8.32	-6.23
M163	Canonical Pathways	PID LIS1 PATHWAY	5	7.25	-7.81	-5.75
GO:0043408	GO Biological Processes	regulation of MAPK cascade	14	20.29	-7.53	-5.49
GO:0071679	GO Biological Processes	commissural neuron axon guidance	4	5.8	-7.53	-5.49
GO:0031589	GO Biological Processes	cell-substrate adhesion	9	13.04	-6.25	-4.29

## Sheet: Table5
Table 5: Biological process GO term analysis for the 13 selected proteins
The analysis was performed for the human proteins at string-db.org
pathway ID	pathway description	count in gene set	false discovery rate
GO:0031344	regulation of cell projection organization	9	5.34e-09
GO:0010975	regulation of neuron projection development	8	1.92e-08
GO:0050767	regulation of neurogenesis	9	1.92e-08
GO:0050769	positive regulation of neurogenesis	7	9.81e-07
GO:0038026	reelin-mediated signaling pathway	3	1.38e-06
GO:0010976	positive regulation of neuron projection development	6	1.65e-06
GO:0016358	dendrite development	5	1.65e-06
GO:0050773	regulation of dendrite development	5	3.34e-06
GO:0006928	movement of cell or subcellular component	9	4.83e-06
GO:0048699	generation of neurons	9	4.83e-06
GO:0048667	cell morphogenesis involved in neuron differentiation	7	5.96e-06
GO:0048812	neuron projection morphogenesis	7	5.97e-06
GO:0040011	locomotion	8	3.71e-05
GO:0016477	cell migration	7	3.98e-05
GO:0009605	response to external stimulus	9	4.97e-05
GO:0051674	localization of cell	7	6.07e-05
GO:0007409	axonogenesis	6	7.99e-05
GO:0061564	axon development	6	9.72e-05
GO:0021952	central nervous system projection neuron axonogenesis	3	0.000131
GO:0010769	regulation of cell morphogenesis involved in differentiation	5	0.000198
GO:0006935	chemotaxis	6	0.000253
GO:0048675	axon extension	3	0.000253
GO:0031175	neuron projection development	6	0.000316
GO:0010770	positive regulation of cell morphogenesis involved in differentiation	4	0.000514
GO:0007411	axon guidance	5	0.000618
GO:0007399	nervous system development	8	0.000829
GO:0048666	neuron development	6	0.000829
GO:0048813	dendrite morphogenesis	3	0.000832
GO:1900006	positive regulation of dendrite development	3	0.00109
GO:0051179	localization	10	0.00211
GO:0030182	neuron differentiation	6	0.00217
GO:0021954	central nervous system neuron development	3	0.00234
GO:0051654	establishment of mitochondrion localization	2	0.00434
GO:0061003	positive regulation of dendritic spine morphogenesis	2	0.00434
GO:0016043	cellular component organization	10	0.00452
GO:0007420	brain development	5	0.0049
GO:0021819	layer formation in cerebral cortex	2	0.0049
GO:0032793	positive regulation of CREB transcription factor activity	2	0.00638
GO:0048589	developmental growth	4	0.00638
GO:0060322	head development	5	0.00638
GO:0001764	neuron migration	3	0.00724
GO:0030900	forebrain development	4	0.00742
GO:0021801	cerebral cortex radial glia guided migration	2	0.0099
GO:0009653	anatomical structure morphogenesis	7	0.0105
GO:0050770	regulation of axonogenesis	3	0.0106
GO:0021543	pallium development	3	0.0149
GO:0045860	positive regulation of protein kinase activity	4	0.0157
GO:0021953	central nervous system neuron differentiation	3	0.0209
GO:0061098	positive regulation of protein tyrosine kinase activity	2	0.0352
GO:0021537	telencephalon development	3	0.0415

## Sheet: Table 6
Table 6: 13 candidate genes that may control the growth of axonal-like protrusions on SCLC cells
Gene name	GO Biological processes with possible links to protrusions (from Uniprot)	Selected references highlighting functional role in neuronal processes, including axonogenesis and migration (PMID)
CXCR4	axon guidance, brain development, cell chemotaxis, neurogenesis	17339400, 18177992, 12832536, 12707308
DBN1	actin filament organization, neural precursor cell proliferation, regulation of dendrite development	28865011, 20882566, 24814707
DCC	axon guidance, axonogenesis, neuron migration	30108487, 30224412, 19601764, 8861903
DCLK1	axon extension, central nervous system development, neuron migration	27503845, 26794512, 26758546
DCX	axoneme assembly, central nervous system development, neuron migration	26500496, 24278775, 16387638, 23303949
FEZ1	axon guidance, cell adhesion, nervous system development	20730382, 22451907, 17669366
FSCN1	cell migration, cell motility, regulation of actin cytoskeleton organization, regulation of filopodium assembly	16928862, 24720729, 21106647
GAP43	axon regeneration, nervous system development, regulation of filopodium assembly	10964748, 3738509, 7859286, 3059197
LRP8	cerebral cortex development, reelin-mediated signaling pathway, ammon gyrus development	28887403, 23495356, 22614235, 28292942
MAP1B	axon extension, axonogenesis, neuron migration, positive regulation of acon extension, microtubule bundle formation	25737712, 22033417, 15789376
RELN	axon guidance, brain development, cell adhesion, central nervous system development, neuron migration	22614235, 28588454, 28292942, 20809939
TIAM1	cell-matrix adhesion, cell migration, ephrin receptor signaling pathway, neuron projection extension	26386179, 23300879, 22570618, 20719958
VLDLR	axon guidance, dendrite morphogenesis, nervous system development, reelin-mediated signaling pathway	23758727, 28292942, 19120042

## Sheet: Table 7
Table 7: Expression levels and dependency scores for the 13 candidates in human SCLC cells
Combined RNAi (Broad, Novartis, Marcotte) data from the Dependency Map (depmap) project, 02/20/2019
	Dependency Score (DEMETER2)	TPM (log2)	Dependency Score (DEMETER2)	TPM (log2)	Dependency Score (DEMETER2)	TPM (log2)	Dependency Score (DEMETER2)	TPM (log2)	Dependency Score (DEMETER2)	TPM (log2)	Dependency Score (DEMETER2)	TPM (log2)	Dependency Score (DEMETER2)	TPM (log2)	Dependency Score (DEMETER2)	TPM (log2)	Dependency Score (DEMETER2)	TPM (log2)	Dependency Score (DEMETER2)	TPM (log2)	Dependency Score (DEMETER2)	TPM (log2)	Dependency Score (DEMETER2)	TPM (log2)	Dependency Score (DEMETER2)	TPM (log2)
	CXCR4	CXCR4	DBN1	DBN1	DCC	DCC	DCLK1	DCLK1	DCX	DCX	FEZ1	FEZ1	FSCN1	FSCN1	GAP43	GAP43	LRP8	LRP8	MAP1B	MAP1B	RELN	RELN	TIAM1	TIAM1	VLDLR	VLDLR
CORL279_LUNG	0.283588	7.79299	0.0297265	6.43346	0.17198	0.0143553	-0.0865528	1.95233	0.0376021	0	-0.0755712	3.35614	0.131862	7.31669	-0.054998	0.176323	-0.0537155	5.30998	0.080086	3.31034	-0.0490314	2.70487	0.233808	3.59813	-0.122204	4.93687
CORL88_LUNG	0.0709895	4.63923	0.0761804	4.67073	0.089729	0.0143553	0.0630283	1.9782	-0.146243	0	-0.315709	1.10434	0.185678	3.14405	0.120391	0.422233	-0.0132607	4.53916	0.0633509	3.80839	0.160902	1.31034	0.00900779	2.08066	0.202561	4.4121
DMS114_LUNG	-0.179692	1.29866	0.107874	4.67469	-0.0227039	0	-0.0702151	0.0426443	-0.0676891	0	-0.181745	0	0.436816	7.37217	0.162296	0	0.0651134	4.29057	0.0349957	3.35614	0.0575188	0.0143553	-0.00823356	0.0426443	-0.377234	2.13422
DMS273_LUNG	-0.248664	5.1416	-0.0366572	7.38024	0.0711054	0.0426443	0.0186976	0.411426	-0.163319	0	-0.528337	0.214125	-0.0440855	7.64623	0.0157881	0	0.0561651	4.72356	0.11911	0.0976108	-0.00458326	0.0426443	-0.0280786	0.176323	0.0501215	0.422233
DMS53_LUNG	-1.01352	1.16993	0.0403664	8.00776	0.192454	0.0143553	0.0503687	0.0285692	0.00403262	0.0143553	-0.284547	0.713696	0.182792	0.422233	0.332334	0	-0.175763	6.35702	0.219089	3.56925	0.0968134	5.14608	-0.189745	2.8679	-0.295437	3.58135
HCC33_LUNG	-0.276127	4.74362	-0.203027	6.30907	0.239484	0	-0.0945163	5.33307	0.198942	0	-0.0157785	0.0426443	-0.0442078	6.12143	0.180142	0.0426443	-0.327485	5.03518	0.139404	4.71699	0.144214	0.389567	0.0592635	0.15056	0.0656691	3.71699
NCIH1048_LUNG	-0.00133684	1.67356	0.039842	5.58767	-0.0363013	0.0143553	-0.182307	2.57531	-0.20323	0	0.0806519	5.86171	-0.134103	0.650765	0.125734	0.0285692	-0.157158	5.07767	-0.117986	4.60585	-0.0271253	0.176323	-0.00210943	0.0285692	-0.424087	4.63459
NCIH1105_LUNG	-0.0947362	5.88191	0.35518	8.20862	0.19331	0.0143553	-0.118027	1.87971	0.165986	0	-0.287271	0.992768	0.255446	4.27053	0.364293	3.0054	0.0149467	5.10852	0.0954402	4.79129	-0.0144771	0.124328	0.323117	2.33914	-0.0749856	4.07553
NCIH1339_LUNG	0.199676	0.895303	0.254484	6.72806	0.0478188	0.333424	-0.035506	2.5435	0.00189026	0.0285692	-0.041417	1.22033	0.174825	4.41549	0.360811	0.0285692	-0.0701378	5.09719	0.0478216	4.64962	0.0273233	0.137504	0.0727912	3.9486	-0.172752	4.85848
NCIH146_LUNG	0.113609	5.99977	0.163719	6.01033	0.0511219	0.0143553	-0.0597149	0.495695	-0.0168381	0	-0.393652	4.04963	0.184531	1.1375	0.179572	0.0976108	-0.00623643	4.15947	0.0809964	4.29352	-0.00620843	0.0426443	-0.461595	2.63459	0.375413	4.20085
NCIH1694_LUNG	-0.353241	4.3978	0.102467	6.19002	0.097247	0	0.0713644	0.963474	0.074504	0	0.283116	5.35332	-0.244181	1.33914	0.0644083	0.879706	-0.0495805	6.76301	-0.0294091	5.20672	-0.0745001	0.124328	0.0715047	3.35755	0.0623017	0.879706
NCIH1836_LUNG	-0.0190309	6.38457	-0.183007	6.72778	-0.292633	5.52826	-0.122868	2.62293	-0.251877	0	-0.0455825	1.46467	0.395771	7.15056	0.570612	0.918386	0.0194688	3.78869	0.0140989	7.0456	0.00317033	3.73552	0.0415511	2.71809	-0.0875846	3.21568
NCIH1876_LUNG	-0.0692281	4.38888	0.0623803	6.99118	0.135954	0	-0.0679722	0.111031	0.0497904	0	-0.290453	1.42223	-0.0922395	7.74214	0.288523	0	-0.163177	4.04002	-0.00675862	3.16511	0.138423	0.0285692	-0.05852	1.01436	-0.285523	0.389567
NCIH196_LUNG	-0.0173563	0.137504	0.0563366	6.09719	0.0179393	3.5741	-0.0520397	0.594549	-0.271243	0	-0.225488	0.722466	0.203464	5.57259	-0.108565	0.163499	0.00230519	4.99186	0.00376971	3.88362	-0.0153818	1.07039	0.24628	4.13996	-0.0799972	3.97177
NCIH2066_LUNG	0.125602	0.731183	0.00940438	5.40565	0.0645661	0.0703893	-0.144268	0.0426443	0.140463	0.0143553	-0.087361	0.687061	0.218212	5.13011	0.556218	0.0143553	0.145512	4.852	-0.00911021	2.19535	-0.124232	0.0143553	0.1369	4.21412	-0.131496	4.07553
NCIH209_LUNG	-0.737304	5.45779	0.182667	6.87283	0.116811	6.09022	-0.110602	0.432959	0.0380743	0	-0.357403	1.09761	-0.0652493	5.21529	0.0873116	3.14731	-0.0504928	3.80012	0.149595	3.36036	0.172975	0.0976108	-0.0285084	3.18269	0.0330133	4.21179
NCIH211_LUNG	-0.138101	1.08406	-0.0463038	5.35014	0.199339	0.0143553	-0.15934	0.0840643	0.101429	0.0143553	-0.275608	1.79494	0.195204	3.73118	0.22161	0.0703893	0.0457653	5.6907	-0.0166647	3.13586	-0.130849	2	0.0346418	3.67807	-0.0592592	2.55336
NCIH2171_LUNG	-0.0661887	6.01636	0.152808	6.18289	-0.0793221	0	0.118274	0.0703893	-0.0507498	0	-0.0970029	0.475085	0.052228	6.5146	-0.0320353	0.0565835	-0.159137	5.20046	0.114306	1.67356	0.0194539	0	0.107128	0.0426443	-0.656558	1.04264
NCIH2286_LUNG	0.0875789	1.17632	-0.00584981	6.13996	0.0893204	0.0143553	-0.250198	0.137504	0.283778	0	0.248742	0.790772	-0.123856	2.58976	-0.0174201	0.0285692	-0.17687	5.13791	0.0790447	3.24793	0.193278	4.64962	0.0596414	2.63691	-0.177433	0.263034
NCIH446_LUNG	0.0168905	3.72792	-0.0223937	0.454176	-0.0182371	0	-0.0337231	2.13422	-0.243292	0	-0.255148	0.0976108	0.150178	3.13422	0.259321	0.0426443	-0.102858	6.35702	-0.026373	5.17153	-0.0196681	0.137504	0.328001	0.321928	-0.0521338	5.5659
NCIH526_LUNG	-0.213642	4.33128	0.098738	6.50954	0.118657	1.9855	-0.0717291	0.0565835	-0.0844791	0	-0.0542656	1.09761	0.268533	2.74201	0.0499332	0.356144	-0.406745	4.3875	-0.0518705	0.15056	0.304963	1.85599	0.0537329	1.52607	-0.158996	0.485427
NCIH841_LUNG	0.118735	3.86592	0.0234796	5.38991	0.0254386	0.0840643	0.0549709	0.0703893	0.15044	0.0143553	-0.217764	0.555816	0.118247	5.21956	0.136135	0.0565835	-0.00876496	4.39643	-0.0573134	5.46695	0.242756	0.0703893	0.179252	0.137504	-0.0279555	4.17233
SBC5_LUNG	-0.359068	0.411426	0.0741002	5.64933	0.0775783	3.38957	-0.138134	2.65992	0.0993014	0	-0.100932	2	-0.0272178	7.67546	-0.0353064	0.0285692	-0.0907778	3.38128	-0.191427	4.01703	0.00875989	0.0840643	-0.00607155	1.1375	-0.357829	0.895303
SHP77_LUNG	-0.175623	3.93923	0.0956637	5.24603	-0.044748	0	-0.261997	0.0703893	-0.098929	0	-0.0534674	0.0976108	-0.110183	5.2407	0.301551	0.0426443	-0.0607916	5.64703	0.0349518	0.0703893	-0.0976739	0.0703893	0.00933451	0.321928	0.339519	3.55459
SW1271_LUNG	0.0277494	1.95977	-0.121434	4.57833	0.172427	0.0143553	-0.237365	0	0.282975	0.0143553	-0.179646	0.238787	0.24208	8.15967	0.0590049	0.0143553	0.0276315	3.7148	0.0771563	4.6011	0.297173	0.0976108	0.132522	3.21101	0.0542908	5.4353
	correlation dep/TPM		correlation dep/TPM		correlation dep/TPM		correlation dep/TPM		correlation dep/TPM		correlation dep/TPM		correlation dep/TPM		correlation dep/TPM		correlation dep/TPM		correlation dep/TPM		correlation dep/TPM		correlation dep/TPM		correlation dep/TPM
	0.0964474		0.276286		-0.352981		-0.0306155		0.325913		0.358698		0.166033		0.129239		-0.118284		-0.143886		0.134593		0.0453773		0.333731

## Sheet: Table 8
Table 8: Knock-down of the 13 candidate genes in mouse SCLC cells
The knock-down efficiency was measured by qRT-PCR in n=1 experiment with 3 technical replicates (mean) and is relative to expression in the shGFP control (value 1)
Gene name	shRNA name	Sequence (5'-3')	Knock-down
CXCR4	A8	ACTTCTGATAACTACTCTGAA	0.57
CXCR4	B1	GTGTTTCAATTCCAGCATATA	0.1
DBN1	D1	GCAGTCTATCTTTGGTGACCA	0.32
DBN1	G5	CCCAGACCAGATTGTAGCTTA	0.39
DCC	B3	GCCAGCATAAGAACAGGAAAT	0.36
DCC	B5	CCCAAGGATCTGACAGTCATT	0.62
DCLK1	A3	GCCCTTTAAGAAGCTGGAGTA	0.55
DCLK1	A5	GACCGCTACTTCAAAGGAATT	0.12
DCX	D7	CGGCTGTAATTGGTGGTTGTA	0.55
DCX	D8	CGCGTGCTTCTCAACAAGAAA	0.12
FEZ1	F1	CGTGAATGAATTTGATGAGAA	0.24
FEZ1	F2	GAGGACCTCGTGAATGAATTT	0.29
FSCN1	I2	CTACAATAAGGTGGCTCTCAA	0.11
FSCN1	I6	CCGTTCCAGTTACGATGTCTT	0.06
GAP43	C5	GAGTCCACTTTCCTCTCTATT	0.96
GAP43	C8	CTGTAGACGAAGCCAAACCTA	0.08
LRP8	L1	CGCAGCAATCAGCAACTATGA	0.06
LRP8	L2	CCCATCTCTGATCTTCACGAA	0.09
MAP1B	D3	CCGAGTTAGACATCAAAGAT	0.15
MAP1B	D5	CGGATTCAACATGCTCATCAA	0.14
RELN	F4	CCGTGGAAATTGTGATCTGTT	0.32
RELN	F6	CCAGGATACATGATGCAATTT	0.2
TIAM1	B8	CGGAATTTGGTGTCGGATATT	0.4
TIAM1	B9	GCCGCTGATAATTACGGGTTT	0.46
VLDLR	G1	CCGAGTCTGATCTTCACTAAT	0.139
VLDLR	G3	CGACGAGAAGAACTGTGTAAA	0.3
GFP		GCAAGCTGACCCTGAAGTTCAT	1

[truncated: 1 more sheets: Table 9]
